# Supplementary material for: The G protein-coupled receptor subset of the rat genome
Source: PubMed Central journal article supplement (PMC2117022; doi:10.1186/1471-2164-8-338), 2007-09-25

# Vomeronasal1

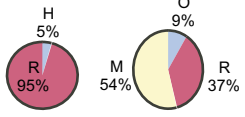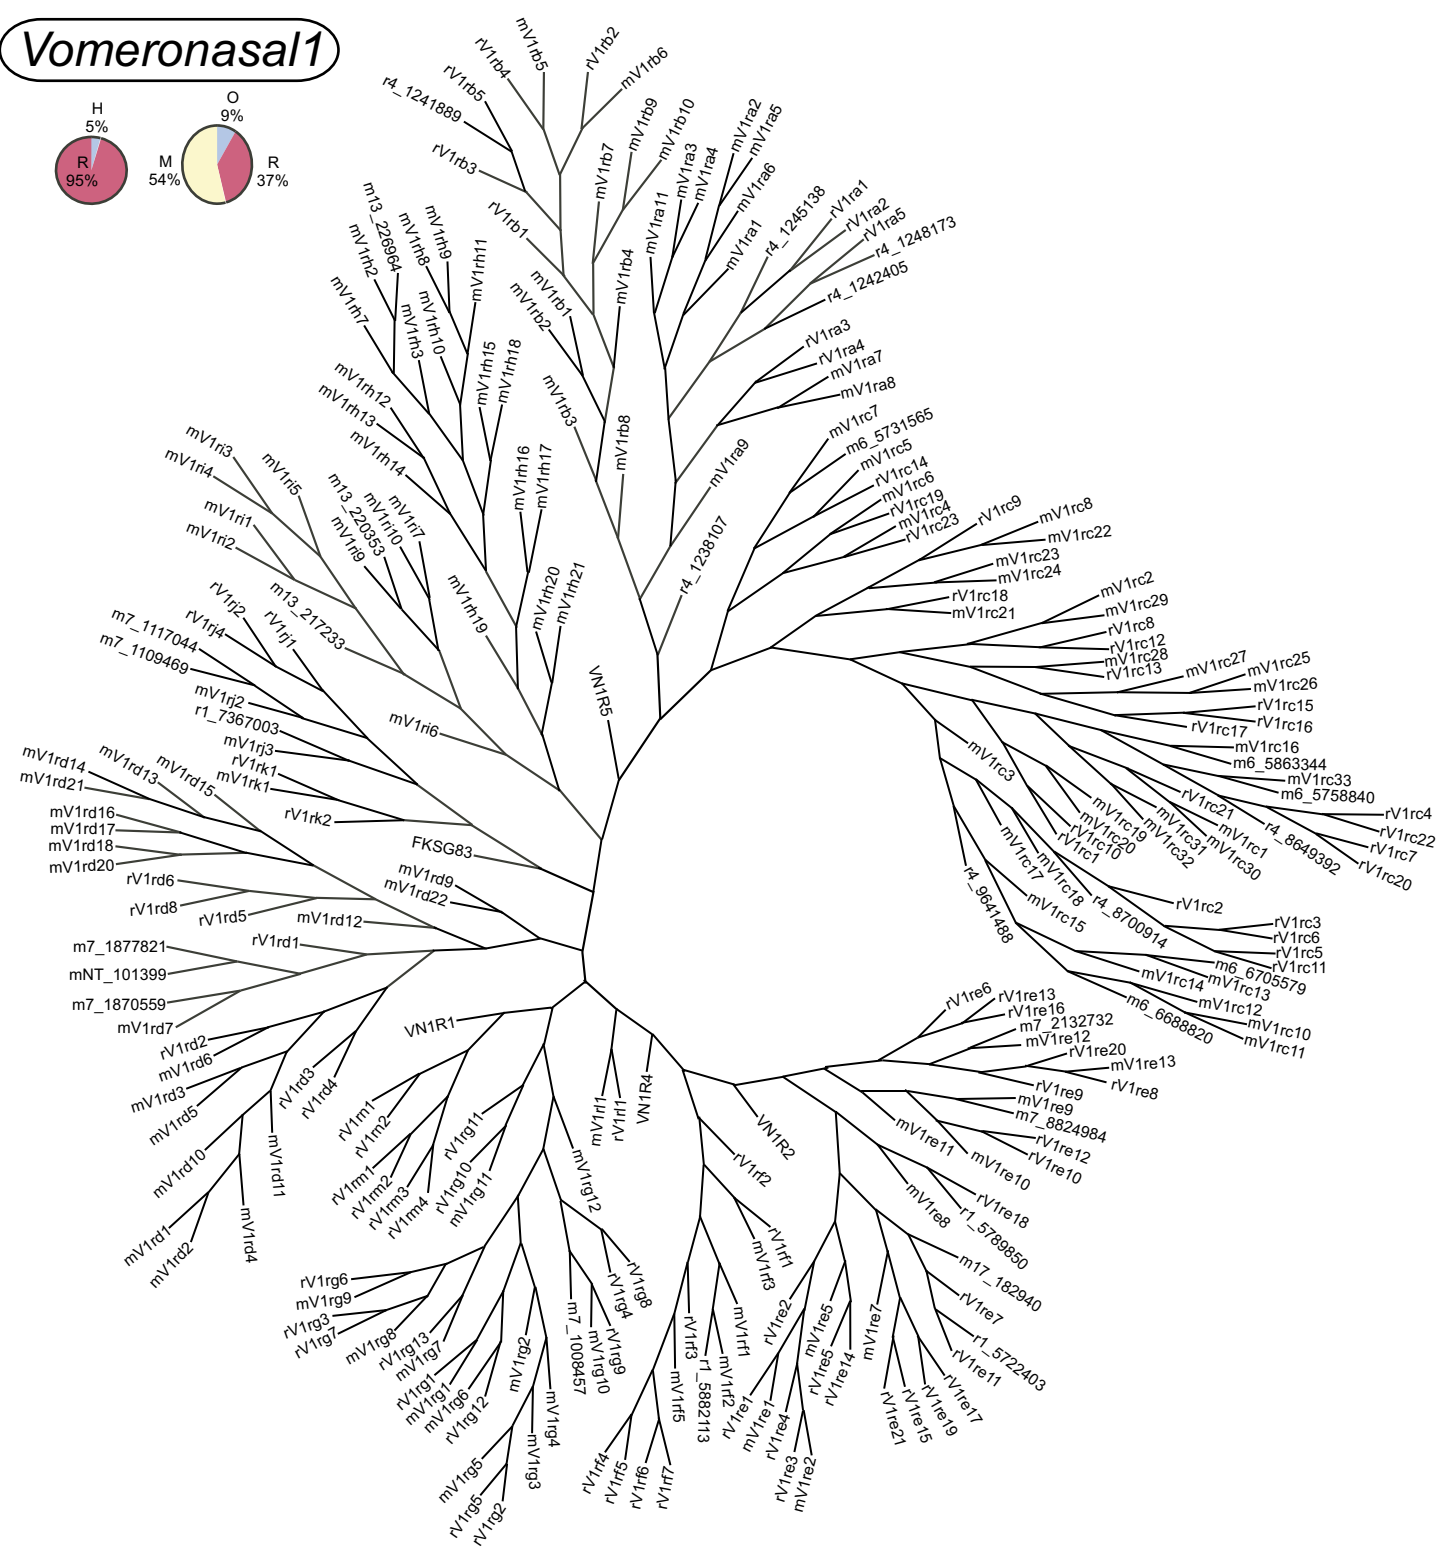

Supplement: 1471-2164-8-338-S5.pdf [file 1471-2164-8-338-S5.pdf]
